# Supplementary material for: Screening of Lactic Acid Bacteria Suitable for the Fermentation of Shenheling Slimming Beverages Based on the Activity Inhibition of Energy Digestive Enzymes and a Sensory Evaluation
Source: MDPI journal article supplement (doi:10.3390/fermentation8100482), 2022-09-25
Supplement: s1 [file s1]

**Table S1** Sensory evaluation standard

| Evaluation indicators    | evaluation standard        | Score |
|--------------------------|----------------------------|-------|
| Grassy (10 points)       | No grass smell             | 7-10  |
|                          | Has a faint grassy smell   | 4-6   |
|                          | Obvious grassy smell       | 0-3   |
| Bitterness (10 points)   | No bitterness              | 7-10  |
|                          | Has a slight bitter taste  | 4-6   |
|                          | Bitterness is obvious      | 0-3   |
| Cassia (10 points)       | No cassia flavor           | 7-10  |
|                          | Has a light cassia flavor  | 4-6   |
|                          | Strong cassia flavor       | 0-3   |
| Sour taste (10 points)   | Moderately sour            | 7-10  |
|                          | Excessive or mild acidity  | 4-6   |
|                          | No sour taste              | 0-3   |
| Fruit flavor (10 points) | Fruit fragrance is obvious | 7-10  |
|                          | A light fruity aroma       | 4-6   |
|                          | No fruit scent             | 0-3   |
| Cool feeling (10 points) | Cool feeling is obvious    | 7-10  |
|                          | Has a slight cool feeling  | 4-6   |
|                          | No cool feeling            | 0-3   |
